# Supplementary material
Source: PubMed Central journal article supplement (PMC4506862)
Supplement: NIHMS694434-supplement-1.pdf [file NIHMS694434-supplement-1.pdf]

## Supplemental Material

### **Crosstalk between Shp1 and PIPKI $\gamma$ controls leukocyte recruitment.**

Anika Stadtmann,<sup>\*,†</sup> Helena Block,<sup>\*,†</sup> Stephanie Volmering,<sup>\*,†</sup> Clare Abram,<sup>‡</sup> Charlotte Sohlbach,<sup>\*,†</sup> Mark Boras,<sup>\*,†</sup> Clifford A. Lowell,<sup>‡</sup> and Alexander Zarbock<sup>\*,†</sup>

<sup>\*</sup> Department of Anesthesiology, Intensive Care and Pain Medicine, University of Muenster, Albert-Schweitzer-Campus 1, 48149 Muenster, Germany, <sup>†</sup> Max-Planck Institute for Molecular Biomedicine, Roentgenstr. 20, 48149 Muenster, Germany, <sup>‡</sup> Department of Laboratory Medicine and the Program in Immunology, University of California, 505 Parnassus Avenue, San Francisco, CA94143-0100, USA,

**Figure S1**

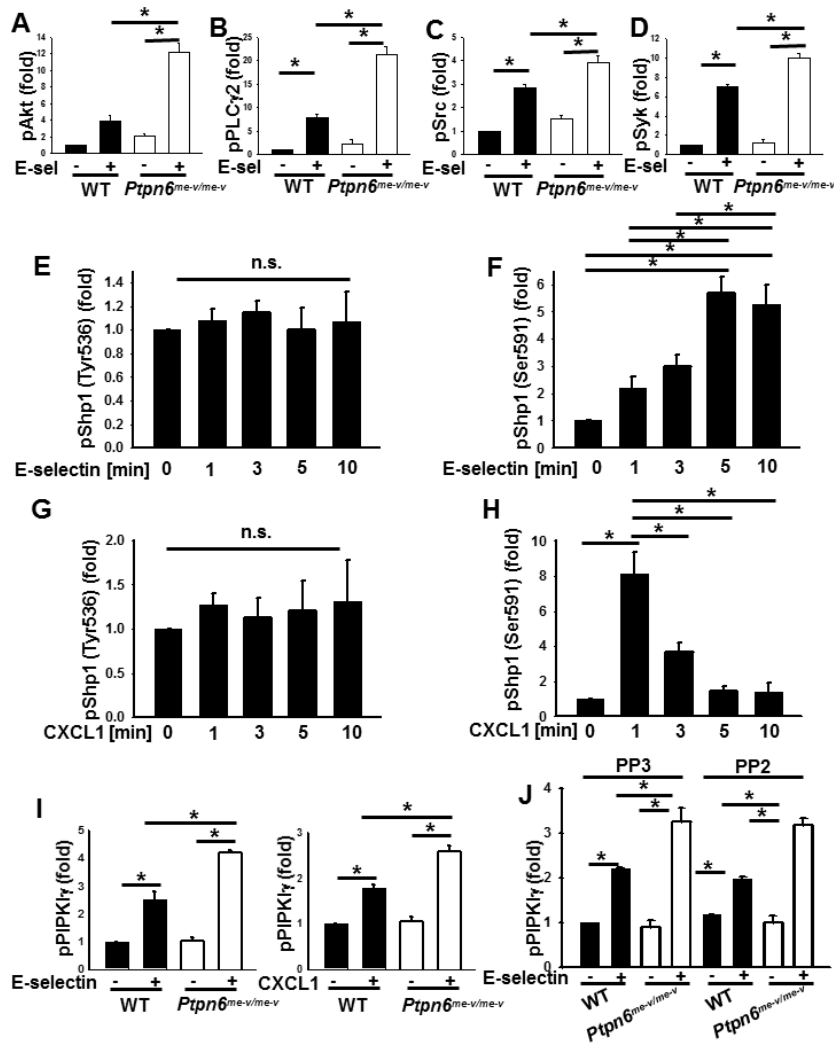

**Supplementary Figure 1: Densitometric analysis of Immunoprecipitations and Western Blots.** Densitometric quantification of immunoprecipitations and Western Blots comparing the phosphorylation of Akt (A), PLC $\gamma$ 2 (B), Src kinases (C) and Syk (D) following E-selectin stimulation in WT and *Ptpn6<sup>me-v/me-v</sup>* (n=3) neutrophils shown in Figure 2G. Densitometric quantification of Western Blots comparing the phosphorylation of the Shp1 (Ser591 or Tyr536) following E-selectin (E+F) or CXCL1 (G+H) stimulation in WT neutrophils shown in Figure 5A-D. Densitometric quantification of Western blots (shown in Figure 6A+B) of immunoprecipitations of PIPKI $\gamma$  in unstimulated, E-selectin and CXCL1 stimulated wild type and *Ptpn6<sup>me-v/me-v</sup>* neutrophils showing the phosphorylation of PIPKI $\gamma$  in the absence (I+J) or presence (J) of a Src family kinase inhibitor.
